# Supplementary material for: Microfluidic synthesis of micrometer-sized photoresponsive actuators based on liquid crystalline elastomers
Source: Royal Society of Chemistry journal article supplement (doi:10.1039/c6tc02587k), 2016-01-01
Supplement: c6tc02587k1.pdf [file c6tc02587k1.pdf]

## Microfluidic Synthesis of Micrometer-Sized Photoresponsive Actuators Based on Liquid Crystalline Elastomers

L. B. Braun, T. Hessberger and R. Zentel\*

### Supporting Information

S 1 Video of the photoactuation of an azo-LCE film.

S 2 Video of the photoactuation of azo-LCE particles.

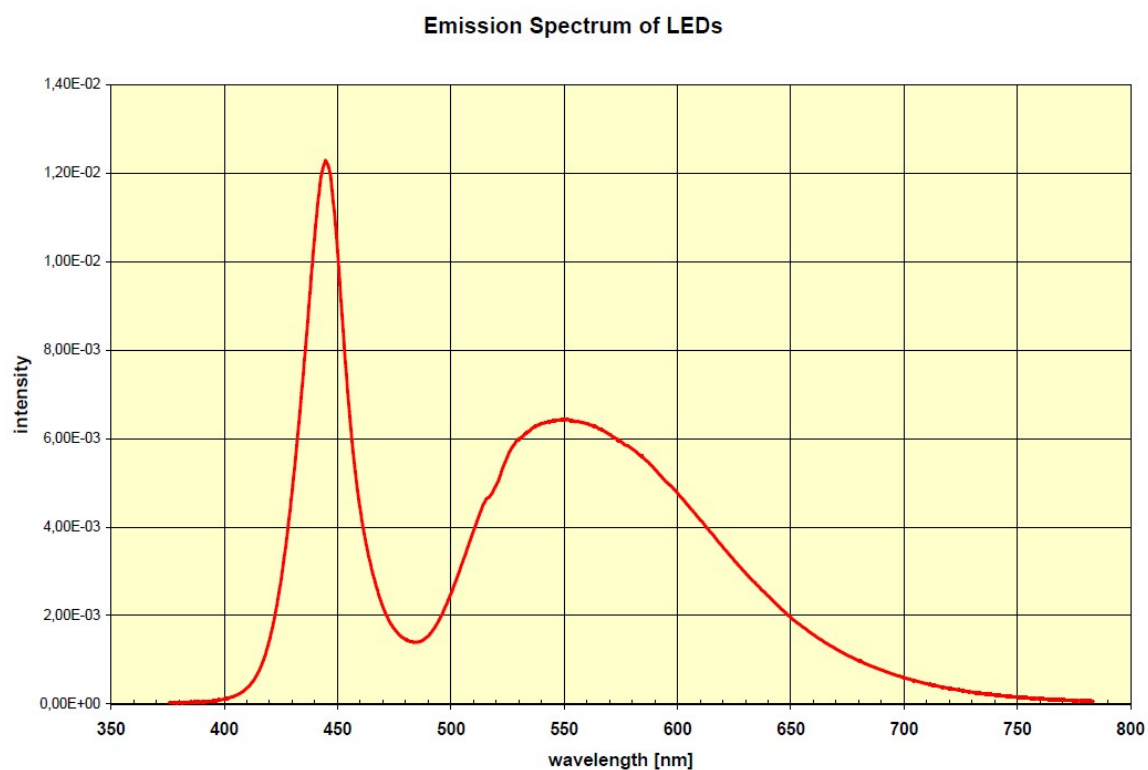

Figure S3. Emission spectrum of the LED in the coldlight source KL1600. (Spectrum provided by Schott AG).

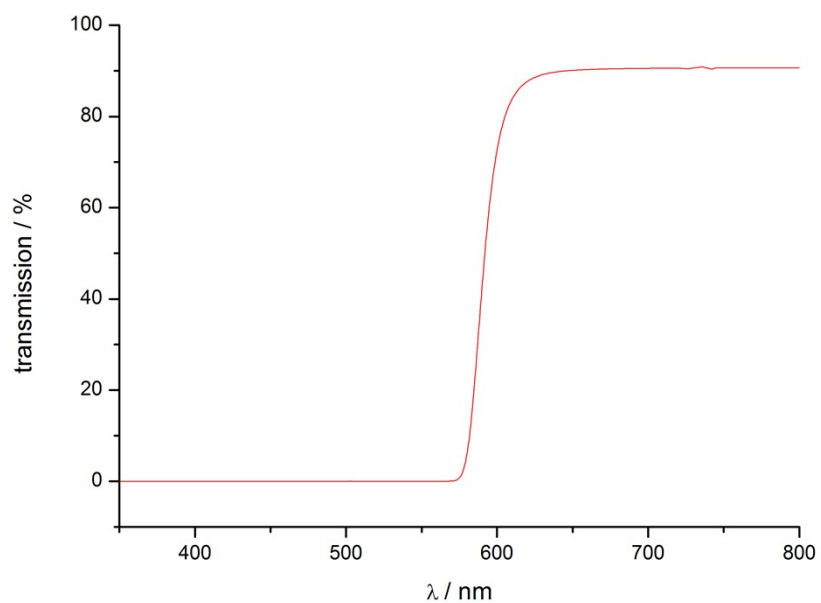

Figure S4. Transmission spectrum of the red light filter OG 590 (Schott).

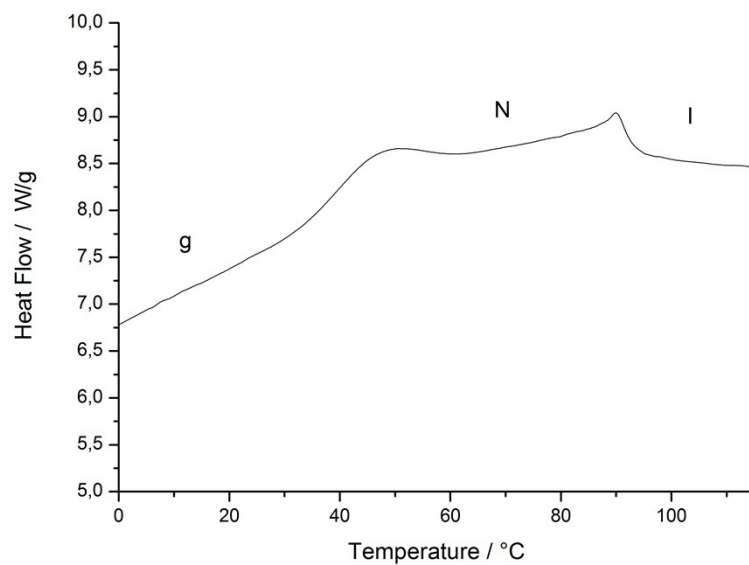

Figure S5. DSC thermogram of the LCE on heating at 20°C/min.  $T_g$  was determined at 37°C and the clearing temperature of the elastomer at 90°C.
